# Supplementary material
Source: publisher figshare collection journal article supplement (https://brill.figshare.com/ndownloader/files/17258519)
Supplement: Supplementary file 1 [file 17258519]

# On recency and dispersion

Stefan Th. Gries  
UC Santa Barbara & JLU Giessen  
<http://tinyurl.com/stgries>

## A very brief recap

- I mentioned earlier this week that (token) freqs alone are maybe not as important as much work in psycholinguistics & cognitive/usage-based linguistics has assumed – we saw
  - doubts from Schmid regarding the nature between freq & entrenchment & this quote "frequency is one major determinant of the ease and speed of lexical access and retrieval, **alongside recency of mention in discourse.**"
  - results from Baayen and others that seem to indicate that frequency-as-repetition is not that important
  - quotes from Ellis et al. pointing towards other factors

Practice promotes proficiency (eg, Anderson, 2009; Bartlett, [1932] 1967; Ebbinghaus, 1885). **Learning, memory and perception are all affected by frequency, recency, and context of usage:** The more times we experience something, the stronger our memory for it, and the more fluently it is accessed. **The more recently we have experienced something, the stronger our memory for it,** and the more fluently it is accessed (Ellis, Römer, & O'Donnell 2016:45f.)

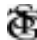

# Today, we will talk about the 2nd crucial mechanism in this quote: recency

- Recency can be seen as being manifested corpus-linguistically in two ways
  - short-term: priming/autocorrelation
  - long-term: dispersion
    - across speakers (ie often files) (recall Dąbrowska 2016)
    - across registers/genres/other corpus parts
- recency is hardly ever utilized outside of the context of priming in both cogn & corpus linguistics
- this is unfortunate, because we know that
  - priming/autocorrelation has a lot of predictive power
  - aggregated freqs disregarding dispersion mean little
- let's unpack those things ...



each instance redefines the system,  
however infinitesimally,  
maintaining its present state or  
shifting its probabilities  
in one direction or the other

(Halliday 1991/2005:67)

## Recency as priming: what's that?

- The first manifestation of recency is priming, ie the fact that an occurrence of x increases the probability of x recurring beyond its (frequency-based) baseline
  - if you've just described a transitive scenario w/ a passive sentence, you're more likely to describe the next transitive scenario also w/ a passive than if you'd just described a transitive scenario w/ an active sentence
  - if you've just described a transfer scenario w/ a prepositional dative, you're more likely to describe the next transfer scenario also w/ a prepositional dative than if you'd just described a transitive scenario w/ a ditransitive
- words can prime themselves like that, too, and they can prime semantically related words, etc
- ie there's different kinds of priming: syntactic, lexical, semantic, phonological, non-linguistic, ...

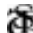

# Recency as priming in corpora

- How would you even recognize it in corpus data?

|    | CORPUS | FILE    | LINE    | PRECEDING                        | MATCH      | MATCHLEMMA | SUBSEQUENT                      | COMPLEMENTIZER | LengthMatrixSubj | ComplementSubjLength |
|----|--------|---------|---------|----------------------------------|------------|------------|---------------------------------|----------------|------------------|----------------------|
| 2  | ICE-GB | S1A-001 | #12:1B  | I                                | think      | think      | the m <,> the main perception   | absent         | 1                | 79                   |
| 3  | ICE-GB | S1A-001 | #12:1B  | un <,> uhm <,> unbalanced <,>    | was        | be         | I think the m <,> the main per  | present        | 79               | 65                   |
| 4  | ICE-GB | S1A-001 | #125:1B | Uh I                             | was        | shocked    | <,> I mean I wasn't shocked     | present        | 1                | 12                   |
| 5  | ICE-GB | S1A-001 | #127:1B | powerful and moving uhm <,>      | is         | be         | Uhm so one of the things that   | absent         | 48               | 5                    |
| 6  | ICE-GB | S1A-001 | #13:1B  | in something that I I saw a lot  | was        | be         | <,> that when people were <,>   | present        | 28               | 6                    |
| 7  | ICE-GB | S1A-001 | #2:1B   | I                                | think      | think      | the main things that I saw as   | absent         | 1                | 85                   |
| 8  | ICE-GB | S1A-001 | #28:1B  | I                                | think      | think      | that the <,> what I get out of  | present        | 1                | 38                   |
| 9  | ICE-GB | S1A-001 | #29:1B  | nobody is left out of this group | is         | be         | Uhm <,> the difference <,> I    | present        | 75               | 18                   |
| 10 | ICE-GB | S1A-001 | #29:1B  | Uhm <,> the difference <,> I     | think      | think      | the main difference that I feel | absent         | 1                | 75                   |
| 11 | ICE-GB | S1A-001 | #31:1B  | he work that I was involved in   | was        | be         | Uhm <,> and I think one of th   | absent         | 55               | 1                    |
| 12 | ICE-GB | S1A-001 | #34:1B  | lop <,> uhm physical skills <,>  | was        | be         | One was that I was being give   | present        | 3                | 1                    |
| 13 | ICE-GB | S1A-001 | #35:1B  | m all sorts of other people <,>  | was        | be         | The other was that this was <,> | present        | 9                | 4                    |
| 14 | ICE-GB | S1A-001 | #38:1B  | e w we 're working with now      | is         | be         | that those <,> movement skill   | present        | 77               | 21                   |
| 15 | ICE-GB | S1A-001 | #48:1B  | We                               | decided    | decide     | that we would work together     | present        | 2                | 2                    |
| 16 | ICE-GB | S1A-001 | #53:1B  | I                                | think      | think      | that would be <,> that 's goin  | absent         | 1                | 4                    |
| 17 | ICE-GB | S1A-001 | #54:1B  | And and I                        | think      | think      | the question can <,> is <,> is  | absent         | 1                | 12                   |
| 18 | ICE-GB | S1A-001 | #55:1B  | I                                | think      | think      | that the problems of working    | present        | 1                | 32                   |
| 19 | ICE-GB | S1A-001 | #64:1B  | And I                            | think      | think      | that 's very much <,> the patt  | absent         | 1                | 4                    |
| 20 | ICE-GB | S1A-001 | #66:1B  | begin to dance with each other   | think      | think      | Uhm <,> so I think there is th  | absent         | 1                | 5                    |
| 21 | ICE-GB | S1A-001 | #71:1B  | Some peo I                       | think      | think      | some people come initially to   | absent         | 1                | 11                   |
| 22 | ICE-GB | S1A-001 | #74:1B  | use the requirement from them    | will be    | be         | that they dance <,> that prim   | present        | 33               | 4                    |
| 23 | ICE-GB | S1A-001 | #74:1B  | But I                            | think      | think      | they very those people are ver  | absent         | 1                | 4                    |
| 24 | ICE-GB | S1A-001 | #98:1B  | nce a week uhm which which       | means      | mean       | that the the pressures on us ar | present        | 5                | 20                   |
| 25 | ICE-GB | S1A-002 | #10:1C  | rested particularly because he   | was saying | say        | that <,> it was a lot of a lot  | present        | 2                | 2                    |

- in some parts of (cogn) ling that's well known
- eg, lg acq research carefully controls for priming
- elsewhere, not so much, which is tricky ...

## Ok then, but why do we care?

- Recency as priming
  - priming is a threat to common regression modeling
    - as a form of autocorrelation, it amounts to a violation of the independence-of-data points assumption
    - it has high predictive power that, if overlooked, can make other predictors seem stronger than they are, ie it makes studies anticonservative
  - example: *will* vs. *going to* vs. *shall* in the Q&A corpus
    - switch % to *will* – % of *will* per speaker
      - many speakers don't alternate, but many also exhibit strong priming effects (esp. in the non-native varieties), variation of priming strengths is less high across topics than across varieties
    - predictive power: 80.9% correct just by
      - choosing a speaker's last construction
      - choosing *will* as the first future

Introduction Introduction  
Recency as priming what's it look like?  
Recency as dispersion what does it do?  
Implications elsewhere & conclusions And - sigh - it can get way more complicated ...

# Ok then, but why do we care?

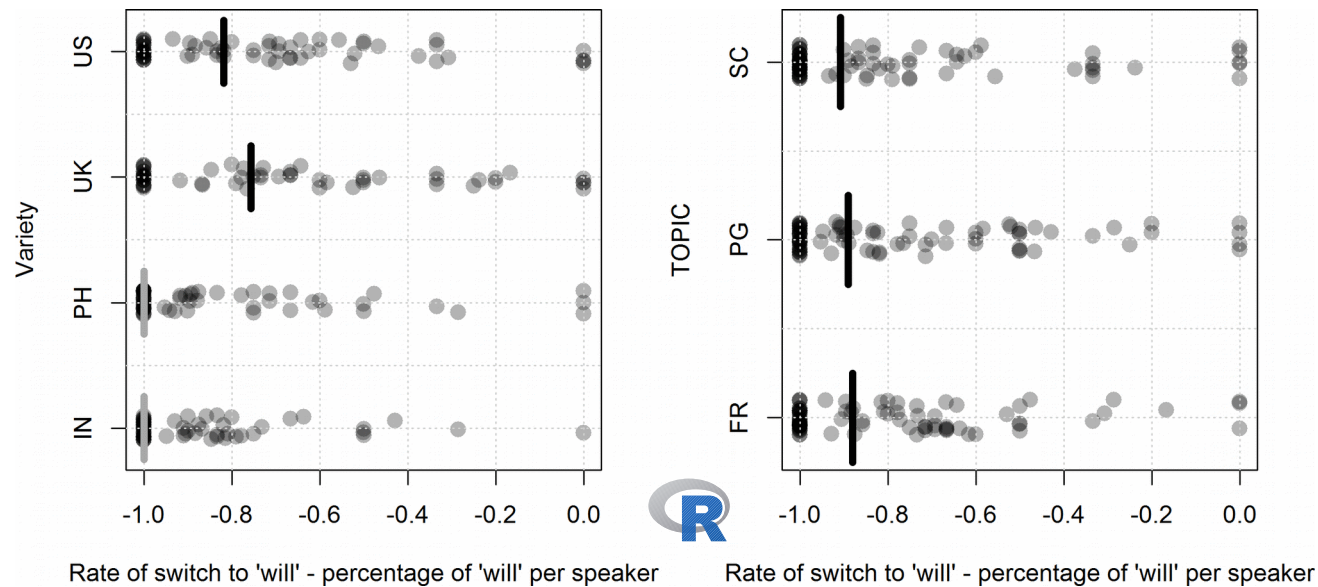



## When we plan on including the role of autocorrelation we should ...

- ... consider (cumulative) priming/learning effects – not just in corpora, also within experiments!
  - Scheepers (2003) explores long-term priming within an experiment by splitting the data into an early and a late half, but finds no significant effect w/ that
  - Jaeger/Snider (2008): **cumulativity**, "the number of primes of each structure previously encountered or produced [...] (excluding the most recent prime)"
    - study voice & *that*-relativizer omissions in corpus data
    - find significant effects of cumulativity
  - STG/Wulff (2009): *to* vs. *ing* complementation in L2 Eng
    - use a sentence-completion experiment w/ German learners
    - find a suggestive tendency for within-subject-accumulative priming
  - Doğruöz/STG (2012): **satiation** (Francom 2009)
    - find that speakers of Turkish become more accepting of unconventional syntactic expressions over 8 stimuli
  - STG (to app): **verb-specific learning effects** in dat.alt.
- thus, we could add a predictor **CUMPRIM** ...

## When we plan on including the role of autocorrelation, we should ...

- ... consider Szmrecsanyi's two kinds of persistence (Szmrecsanyi's 2005, 2006 word for 'priming')
  - $\alpha$ -persistence – what we called **recency-as-priming**
    - **previous exposure to the same variable**: the use of variant X will facilitate/make more likely a subsequent use of X
      - e.g., analytic comparatives prime analytic comparatives
      - e.g., *going-to* futures prime *going-to* futures
  - $\beta$ -persistence
    - **previous exposure to a related/similar variable**: the use of variant X will facilitate/make more likely the use of a similar/related variant of Y
      - e.g., uses of *more* outside of analytic comparatives prime analytic comparatives
      - e.g., uses of *go* as a motion verb prime *going-to* futures
- thus, adding predictors such as **LASTCHOICE** and **LASTCHOICEWGHT** is good, but not even enough since they do not consider  $\beta$ -persistence – we might need **LASTSIMILAR**

# When we plan on including the role of autocorrelation we should

$$d_{ij} = \frac{\sum_{k=1}^p w_k \delta(ij; k) d(ij; k)}{\sum_{k=1}^p w_k \delta(ij; k)}$$

- ... consider a role of **prime-target similarity** going beyond  $\beta$ -persistence
  - there is a well-documented **lexical-identity boost** (Pickering/Branigan 1998, STG 2005, Szmrecsanyi 2005)
  - there is an effect of **global prime-target similarity**: Snider (2009) finds that "When the prime construction is PO, the PO construction is 10.6 times more likely in the target for every one-unit decrease in [GlobalSim]"
  - there is an effect of verb-sense-identity boost for dat.alt. (Bernolet/Colleman/Hartsuiker 2014)
- ... consider the role of **surprisal** for priming (later)
- ... thus, we could add predictors **LEXID** and **PRIM2TARGSIM** and **SURPRISAL** – all of this requires very careful planning, annotation, & evaluation

## Recency as dispersion: what's that?

- The second manifestation of recency is dispersion, ie the fact that occurrences of  $x$  are usually not evenly distributed across the parts of a corpus
- this affects
  - freqs of occurrence: *HIV*, *keeper*, & *lively* are equally freq in the BNC (16 pmw) but differ
    - re range: 62, 97, and 97, of 100 equally-sized corpus parts
    - re Juilland's  $D$ : 0.56, 0.87, 0.92 respectively
  - freqs of co-occurrence: verbs most attracted to the imperative in the ICE-GB: *see*, *let*, *look*, *fold*, *worry*, *listen*, *take*, *remember*, 5 more, *process* (15), but *fold* & *process* in imperatives occur in only  $1/500$  files ( $D=0$ )
  - everything: dispersion affects every single kind of frequency you can get from a corpus

# Recency as dispersion: what's that computed on (ideally)?

- Note: most (of the too few) applications of dispersion measures are based on dividing the corpus into parts that are linguistically irrelevant
- but corpora usually come with a linguistically meaningful substructure, which provides levels of resolution over which to compute dispersion
  - files (if those correspond to speakers/texts/otherwise meaningful sampling units)
  - registers, subregisters, genres, modes, ...
- if you do not consider dispersion, any statement about 'what's in a corpus' is
  - a generalization over parts of a corpus that may be valid, but also ...
  - a generalization over parts of a corpus that
    - hopes that the  $H_0$  of equal distributions is right
    - may be terribly wrong or oversimplified if said  $H_0$  is wrong
- what, you don't believe me?

# How frequencies of present perfects change when you look at corpus parts ...

| Mode    | Register    | Sub-register     | File            |
|---------|-------------|------------------|-----------------|
| spoken  | dialog      | private          | f1, f2, f3, ... |
|         |             | public           | f10, f11, ...   |
|         | monolog     | scripted         | f20, f21, ...   |
|         |             | unscripted       | f30, f31, ...   |
| written | mix         | broadcast        | f40, f41, ...   |
|         |             | print            | f50, f51, ...   |
|         | print       | academic         | ...             |
|         |             | creative         | ...             |
|         |             | instructional    | ...             |
|         |             | non-academic     | ...             |
|         |             | persuasive       | ...             |
|         |             | reportage        | ...             |
|         | non-printed | letters          | ...             |
|         |             | non-professional | ...             |

# How frequencies of present perfects change when you look at corpus parts ...

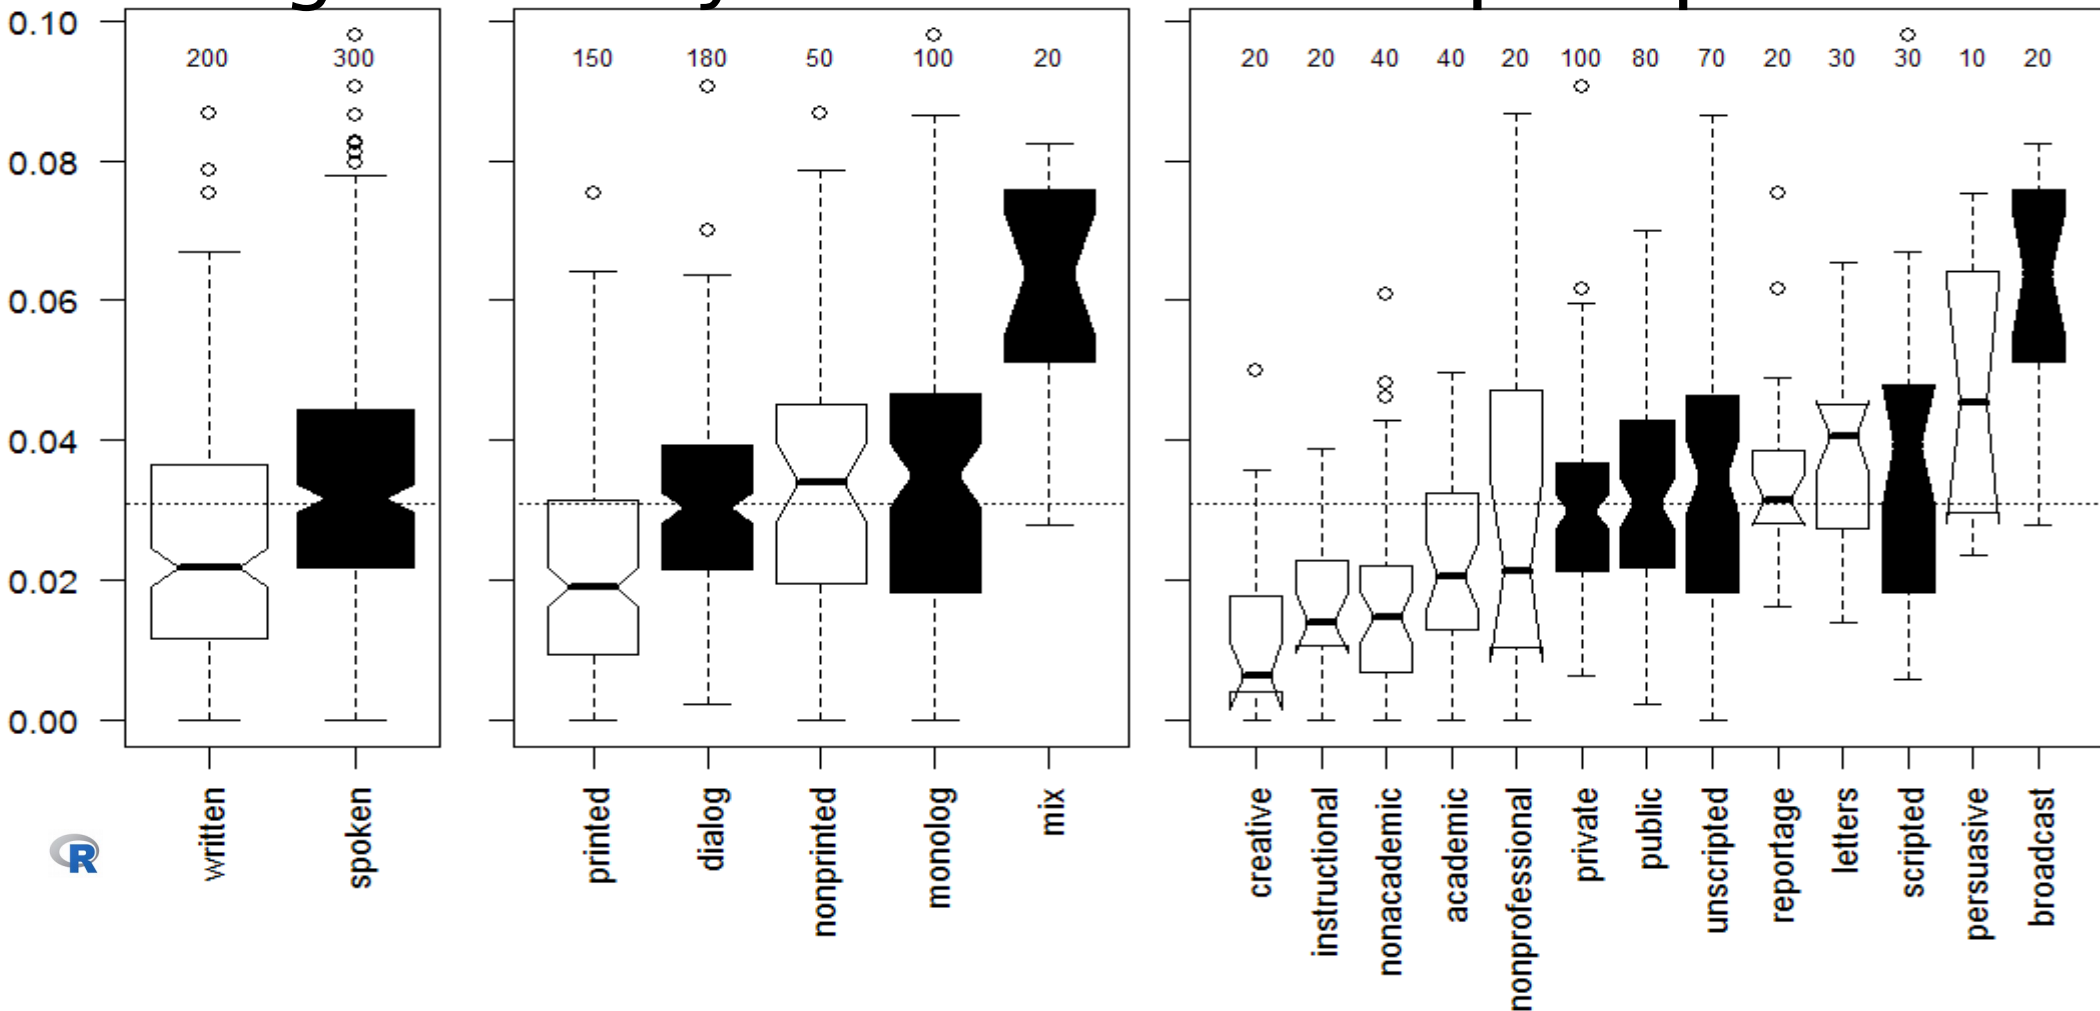

# How frequencies of *quite* change when you look at speakers in corpus parts ...

- Here are some %s of the word *quite* in
  - native speaker data (EN)
  - non-native speaker data (SP, FR, NO, GE)
- here's the speaker variability ...
- most don't even use *quite*
- here's how sampling-dependent these results are
- many similar results: STG (2006), Callies (2013), Gablasova, Brezina, & McEnery (2017), ...

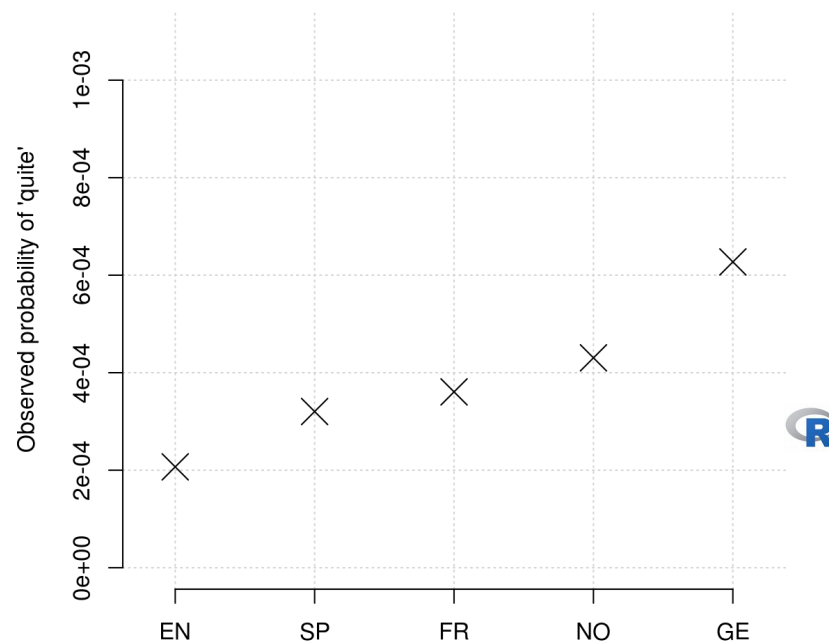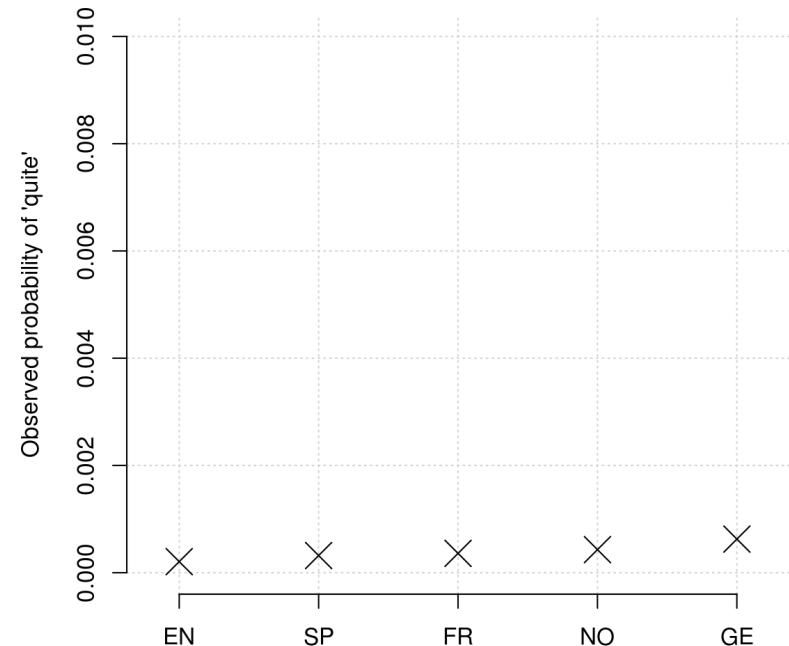



# How frequencies of *quite* change when you look at speakers in corpus parts ...

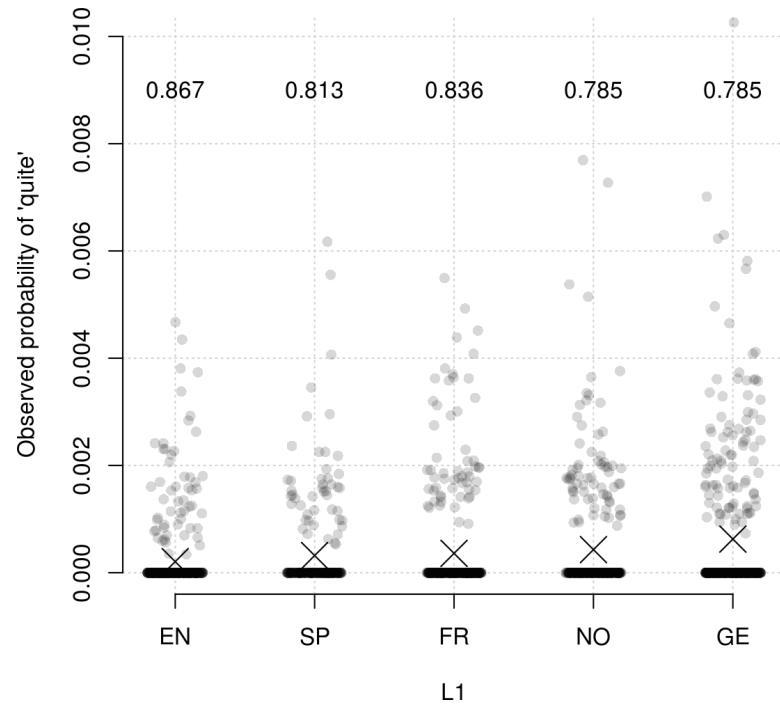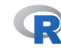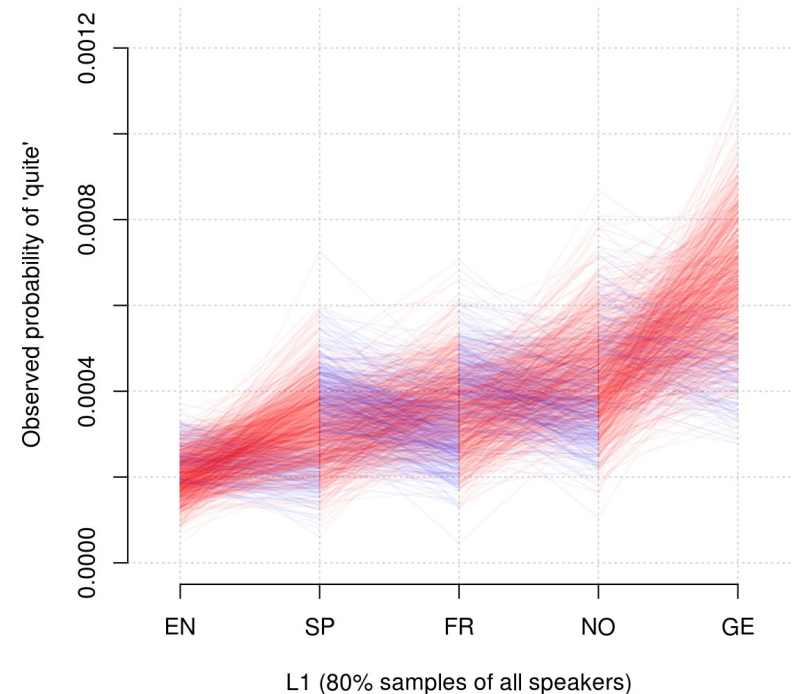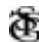

# Studies relying on aggregate frequencies are ~~potentially~~ likely useless

- What do these studies show?
  - Gablasova, Brezina, & McEnery (2017) on *I think* in the Trinity Lanc Corpus of learner language
  - Callies (2013) documents similar variability for first-*person* pronouns in MICUSP and CALE
  - and of course this isn't just the case in learner language: Gablasova, Brezina, & McEnery (2017) again
  - in fact, without any success whatsoever, STG (2006) promoted a whole research agenda on corpus homogeneity using permutation/resampling methods
    - no, his focus wasn't highlighting differences between speakers
    - but yes, every corpus result is affected to some degree by corpus homogeneity
- no study that wants to be usage-based can afford to not at least explore different speakers' usages!

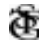

Introduction what happens if you ignore dispersion  
 Recency as priming A measure of dispersion: *DP*  
 Recency as dispersion Theoretical & empirical motivations  
 Implications elsewhere & conclusions Use both frequency and dispersion

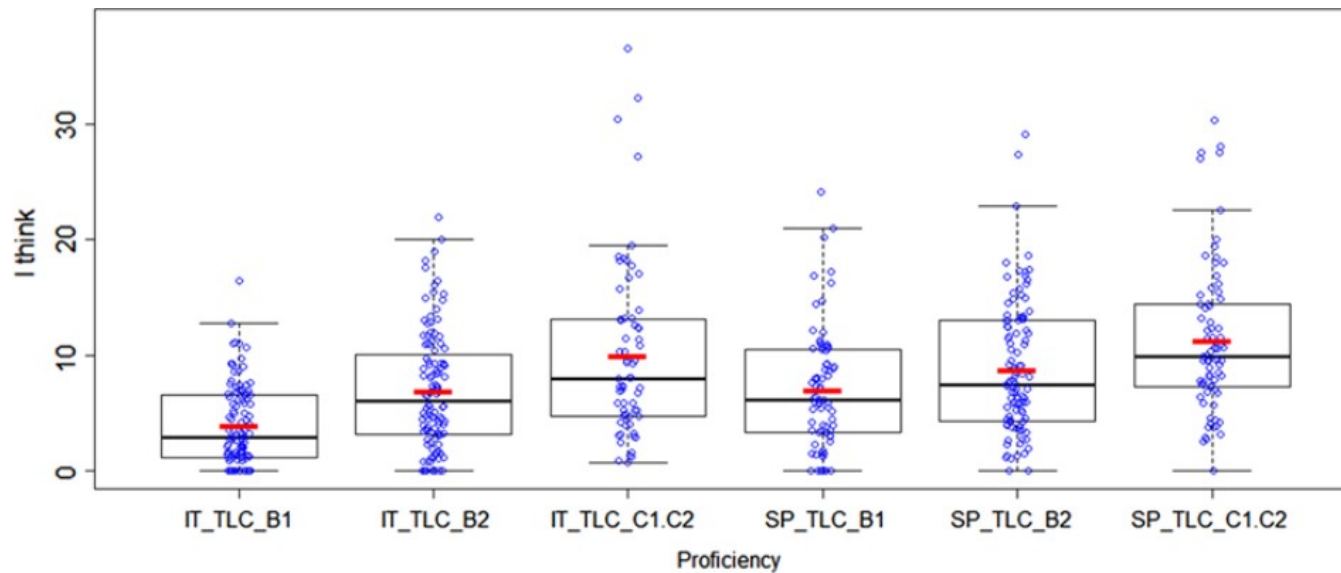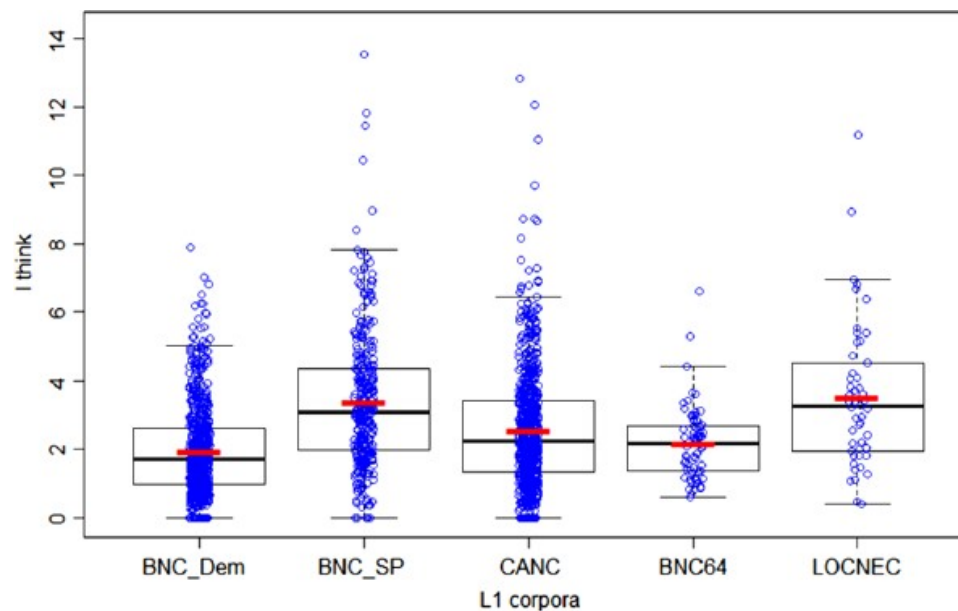

Introduction what happens if you ignore dispersion  
 Recency as a measure of dispersion: *DP*  
 Recency as dispersion Theoretical & empirical motivations  
 Implications elsewhere & conclusions Use both frequency and dispersion

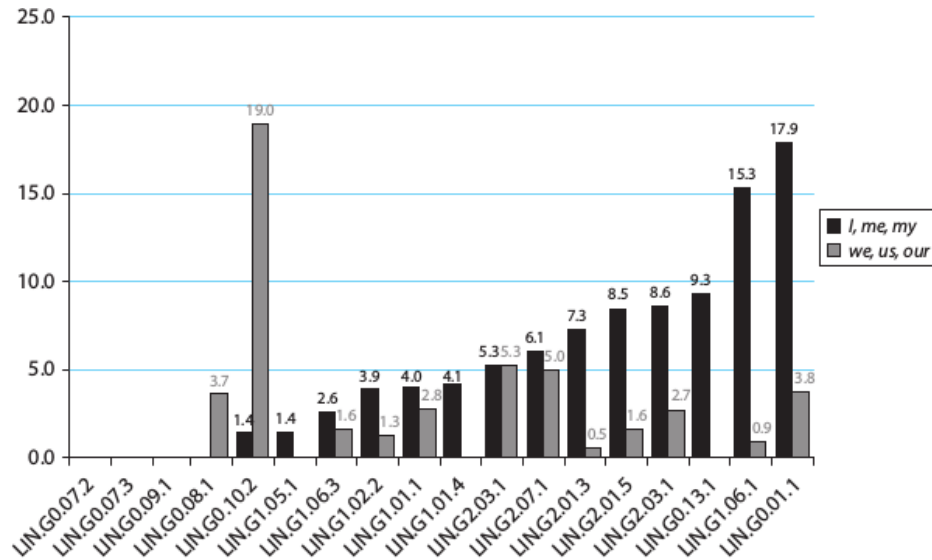

Figure 4. Use of first person pronouns per 1,000 words by individual writers in MICUSP

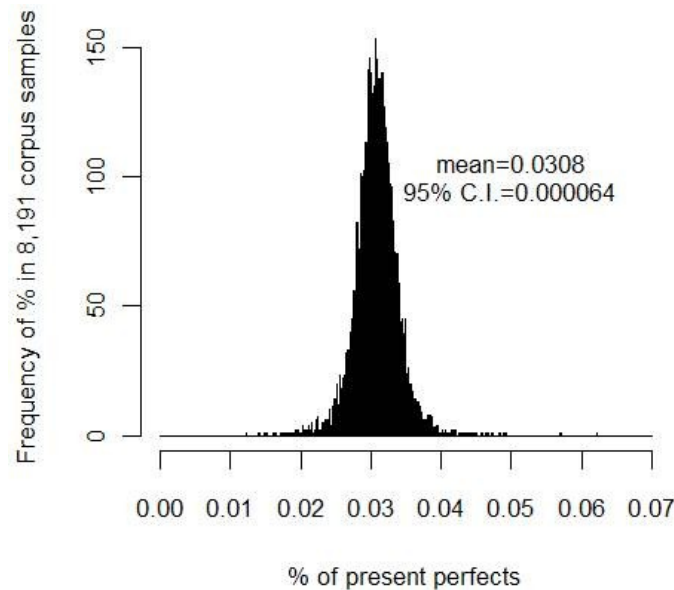

On recency and dispersion

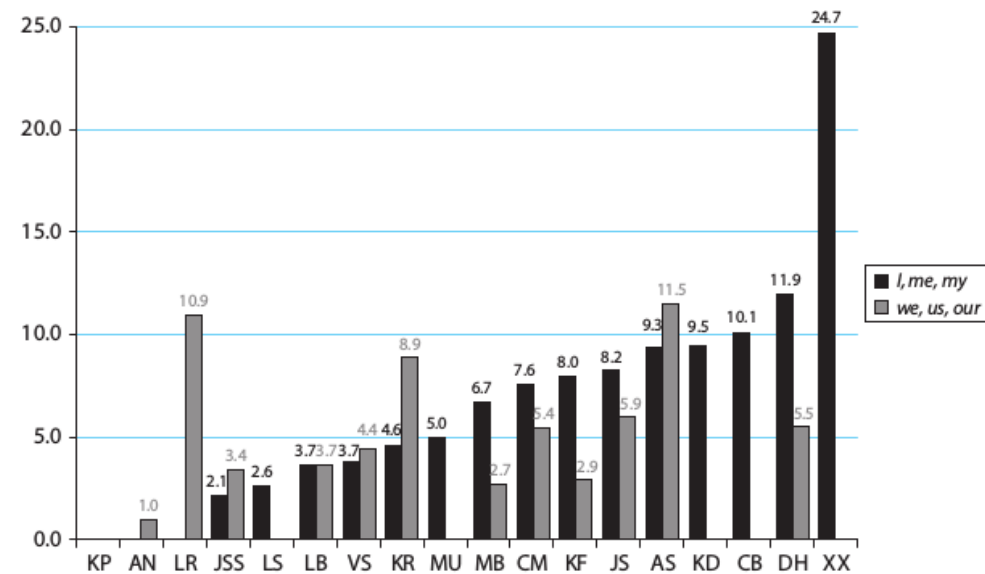

Figure 5. Use of first person pronouns per 1,000 words by individual writers in CALE

Stefan Th. Gries  
 UC Santa Barbara & JLU Giessen

## How frequencies can be misleading ...

- Imagine you're looking for verbs/adjectives from some frequency range in the Brown corpus (35-40 pm)
  - because you need stimuli for a psycholinguistic experiment or a vocabulary test
  - because you need words for a vocabulary list ...
- so you find these two: *enormous* & *staining* ( $n=37$ )
- but you probably didn't at all reach your goal (of finding words that are identified equally fast/accurately, that learners are equally likely to know, ...)
  - *enormous*: 1 each in 35 corpus parts and 2 in 1
  - *staining*: 37 in 1 corpus part
- "Language users are more likely to experience constructions that are widely or evenly distributed in time or place. When they do so, contextual dispersion indicates that a construction is broadly conventionalized, temporal dispersion shares out recency effects." - this supersedes frequency!



# What measure of dispersion to use ...

- Many measures of dispersion have been proposed ...
  - range: the number of corpus parts containing *x*
  - *sd/vc* of the frequencies of *x* in the corpus parts
  - Juilland's  $D = 1 - \frac{sd_{population}(p)}{mean(p)} \times \frac{1}{\sqrt{(n-1)}}$
  - Carroll's  $D_2 = \frac{-\sum_{i=1}^n (\frac{p_i}{\sum p} \times \log_2 \frac{p_i}{\sum p})}{\log_2 n}$
  - Rosengren's  $S = (\sum_{i=1}^n \sqrt{s_i \cdot v_i})^2 \times \frac{1}{f}$  (with  $min S = 1/n$ )
  - $DP = 0.5 \times \sum_{i=1}^n \left| \frac{v_i}{f} - s_i \right|$
- Deviation of Proportions *DP* (Gries 2008), ie  $\text{sum}(\text{abs}(\text{OBS}-\text{EXP}))/2$ 
  - stays within its defined comparable range
  - distinguished distributions other measures can't
  - doesn't overly penalize 0s
  - has been shown to be better than the standard of Juilland's *D* (Biber et al. 2016, Burch et al. 2017)
- how does *DP* behave when applied to pseudo-randomly sampled words from the BNC sampler?

Introduction what happens if you ignore dispersion  
 Recency as priming A measure of dispersion: *DP*  
 Recency as dispersion Theoretical & empirical motivations  
 Implications elsewhere & conclusions Use both frequency and dispersion

| Example number | Exp<br>(sizes of parts) | Obs<br>(distribution) | abs<br>diff | sum of<br>abs diff | divide by 2<br><i>DP</i> |
|----------------|-------------------------|-----------------------|-------------|--------------------|--------------------------|
| 1              | 0.33                    | 0.33                  | 0           | 0                  | 0                        |
|                | 0.33                    | 0.33                  | 0           |                    |                          |
|                | 0.33                    | 0.33                  | 0           |                    |                          |
| 2              | 0.33                    | 1                     | 0.67        | 1.33               | 0.665                    |
|                | 0.33                    | 0                     | 0.33        |                    |                          |
|                | 0.33                    | 0                     | 0.33        |                    |                          |
| 3              | 0.01                    | 0.98                  | 0.97        | 1.94               | 0.97                     |
|                | 0.01                    | 0.01                  | 0           |                    |                          |
|                | 0.98                    | 0.01                  | 0.97        |                    |                          |
| 4              | 0.01                    | 0                     | 0.01        | 0.04               | 0.02                     |
|                | 0.01                    | 0                     | 0.01        |                    |                          |
|                | 0.98                    | 1                     | 0.02        |                    |                          |
| 5              | 0.45                    | 1                     | 0.55        | 1.1                | 0.55                     |
|                | 0.35                    | 0                     | 0.35        |                    |                          |
|                | 0.2                     | 0                     | 0.2         |                    |                          |
| 6              | 0.45                    | 0                     | 0.45        | 1.3                | 0.65                     |
|                | 0.35                    | 1                     | 0.65        |                    |                          |
|                | 0.2                     | 0                     | 0.2         |                    |                          |
| 7              | 0.45                    | 0                     | 0.45        | 1.6                | 0.8                      |
|                | 0.35                    | 0                     | 0.35        |                    |                          |
|                | 0.2                     | 1                     | 0.8         |                    |                          |

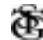

# What measure of dispersion to use ...

| Minimal <i>DPS</i> |           |        | Intermediate <i>DPS</i> |           |      | Maximal <i>DPS</i> |           |      |
|--------------------|-----------|--------|-------------------------|-----------|------|--------------------|-----------|------|
| Word               | <i>DP</i> | Freq   | Word                    | <i>DP</i> | Freq | Word               | <i>DP</i> | Freq |
| <i>a</i>           | 0.08      | 39122  | <i>definition</i>       | 0.8       | 102  | <i>macari</i>      | 1         | 10   |
| <i>to</i>          | 0.1       | 46188  | <i>includes</i>         | 0.72      | 102  | <i>mamluks</i>     | 1         | 10   |
| <i>and</i>         | 0.11      | 53224  | <i>thousands</i>        | 0.71      | 102  | <i>lemar</i>       | 1         | 10   |
| <i>with</i>        | 0.16      | 11138  | <i>plain</i>            | 0.71      | 102  | <i>sem</i>         | 0.99      | 10   |
| <i>but</i>         | 0.16      | 10569  | <i>formal</i>           | 0.71      | 102  | <i>hathor</i>      | 0.99      | 10   |
| <i>in</i>          | 0.16      | 32201  | <i>anywhere</i>         | 0.65      | 102  | <i>tatars</i>      | 0.99      | 10   |
| <i>not</i>         | 0.17      | 9211   | <i>properly</i>         | 0.63      | 102  | <i>scallop</i>     | 0.99      | 10   |
| <i>this</i>        | 0.17      | 9652   | <i>excuse</i>           | 0.61      | 102  | <i>malins</i>      | 0.99      | 10   |
| <i>the</i>         | 0.17      | 104253 | <i>hardly</i>           | 0.59      | 102  | <i>ft</i>          | 0.99      | 102  |
| <i>have</i>        | 0.18      | 11929  | <i>er</i>               | 0.56      | 9721 | <i>defender</i>    | 0.98      | 10   |
| <i>be</i>          | 0.21      | 12735  | <i>each</i>             | 0.47      | 1007 | <i>scudamore</i>   | 0.98      | 10   |
| <i>are</i>         | 0.22      | 9771   | <i>lot</i>              | 0.47      | 1032 | <i>pre</i>         | 0.95      | 10   |
| <i>that</i>        | 0.23      | 29283  | <i>house</i>            | 0.45      | 1024 | <i>diamond</i>     | 0.94      | 102  |
| <i>there</i>       | 0.24      | 9243   | <i>tell</i>             | 0.41      | 1023 | <i>carl</i>        | 0.94      | 102  |

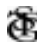



# What that measure of dispersion does & how it relates to frequency ...

The relation between word frequency and dispersion (DP)

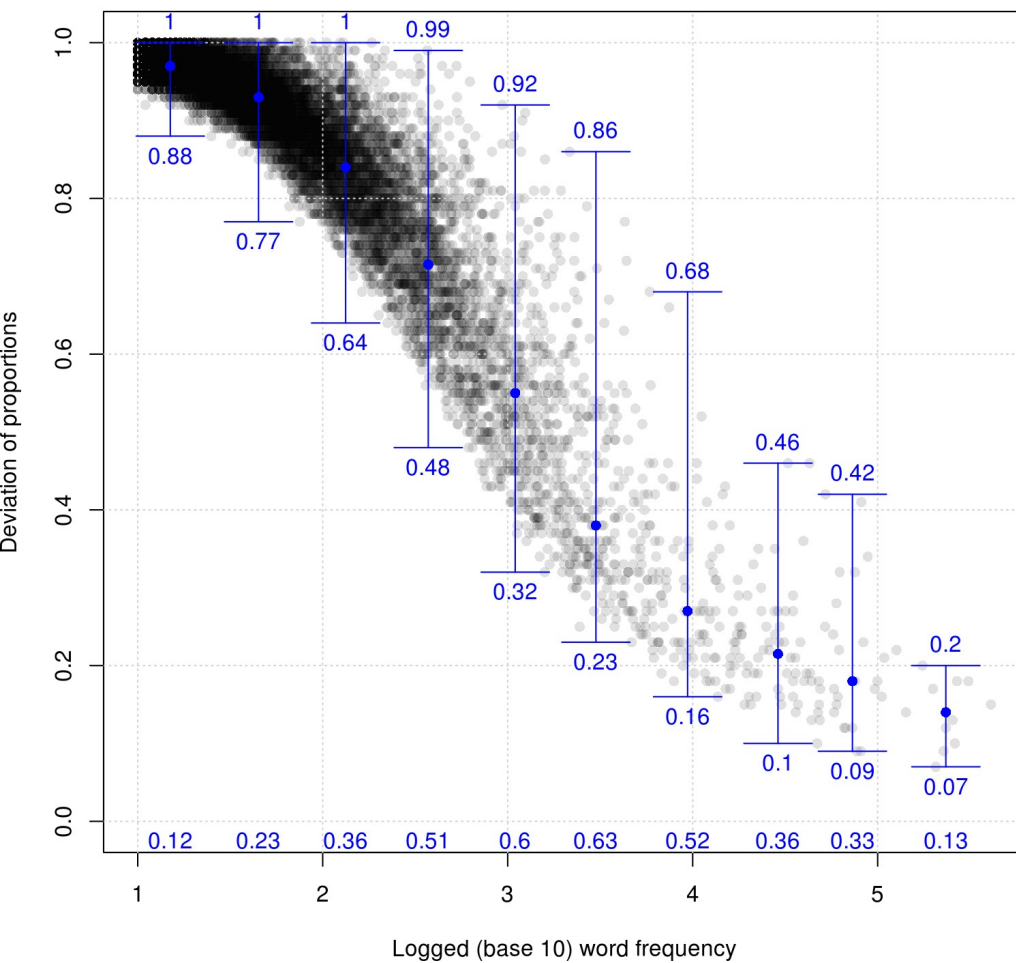

On recency and dispersion

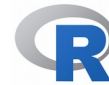

The relation between word frequency and dispersion (range)

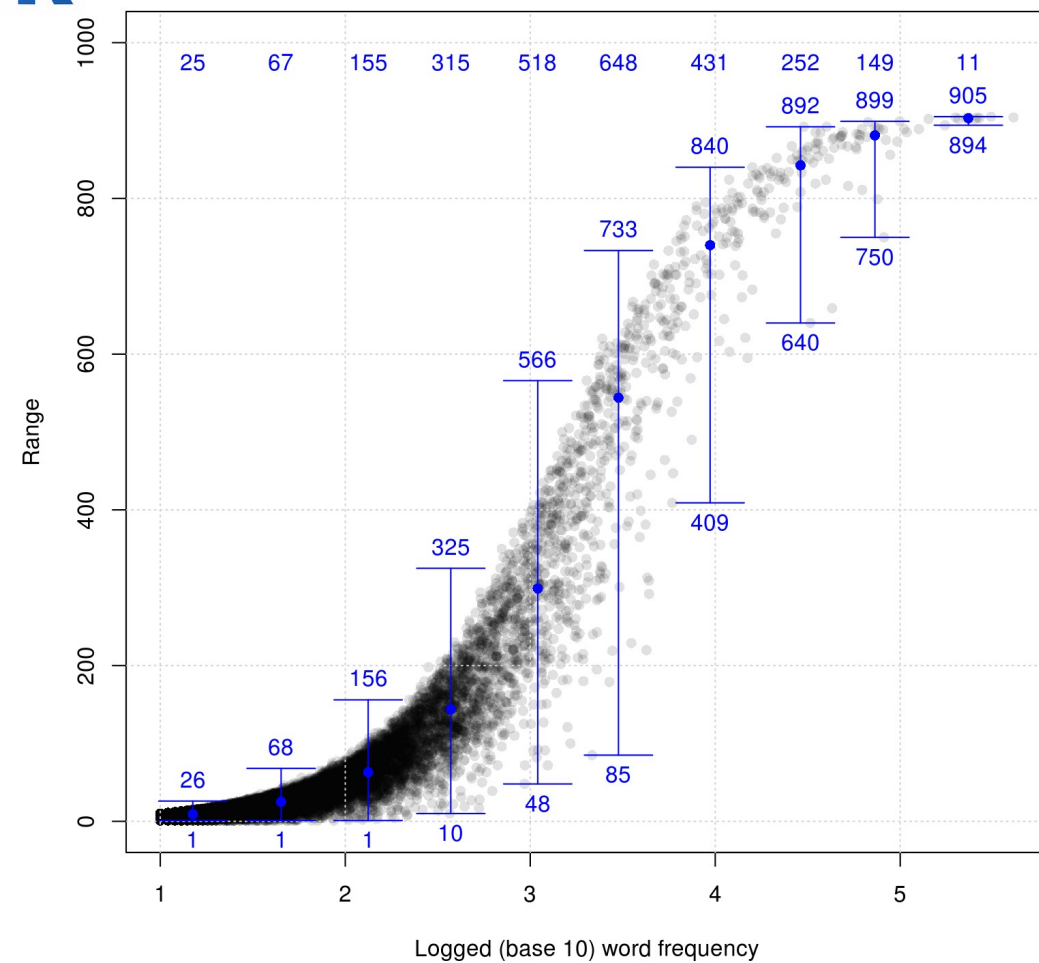

Stefan Th. Gries  
 UC Santa Barbara & JLU Giessen

## The relationship of corpus frequency and DP

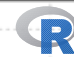

# what theoretical motivation do we have to use dispersion?

- "Given a certain number of exposures to a stimulus, or a certain amount of training, **learning is always better when exposures or training trials are distributed over several sessions than when they are massed into one session.** This finding is extremely robust in many domains of human cognition." (Ambridge et al. 2006:175)
- learning is related to separations of exposures in time & context (Glenberg 1976, 1979)
- the extent to which the number of repeated exposures to a particular item affects that item's later retrieval depends on the **separation of the exposures in time and context**" (Adelman et al. 2006:814)
- Schooler & Anderson (1997) also demonstrated that there is a power (i.e., log-log linear) function relating probability of a word occurring in the headline in the NYT on day  $n$  to how long it has been since the word previously occurred in that context. The human forgetting curve (Ebbinghaus, 1885) is rational in that it follows this trend. (Ellis, Römer, & O'Donnell 2016:37f.)

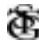

# What empirical motivation do we have to use dispersion?

- You mean apart from all of the above?!
- Ellis & Simpson-Vlach (2005) & Ellis et al. (2007) show that range) has significant predictive power above & beyond raw frequency
- Adelman, Brown, & Quesada's (2006) show that range is a better & more unique predictor of RTs
- Gries (2010) shows that some dispersion measures correlate more highly than raw frequencies with
  - response time latencies from Balota & Spieler (1998)
  - lexical decision task times from Baayen (2008)
- Baayen's (2010) comprehensive analysis mentioned earlier finds that dispersion is the second strongest of 19 predictors of lex dec times
  - yes, in that study frequency is the strongest, but
  - frequency is 91% explainable from everything else, &
  - repetition frequency does little else



# what empirical motivation do we have to use dispersion?

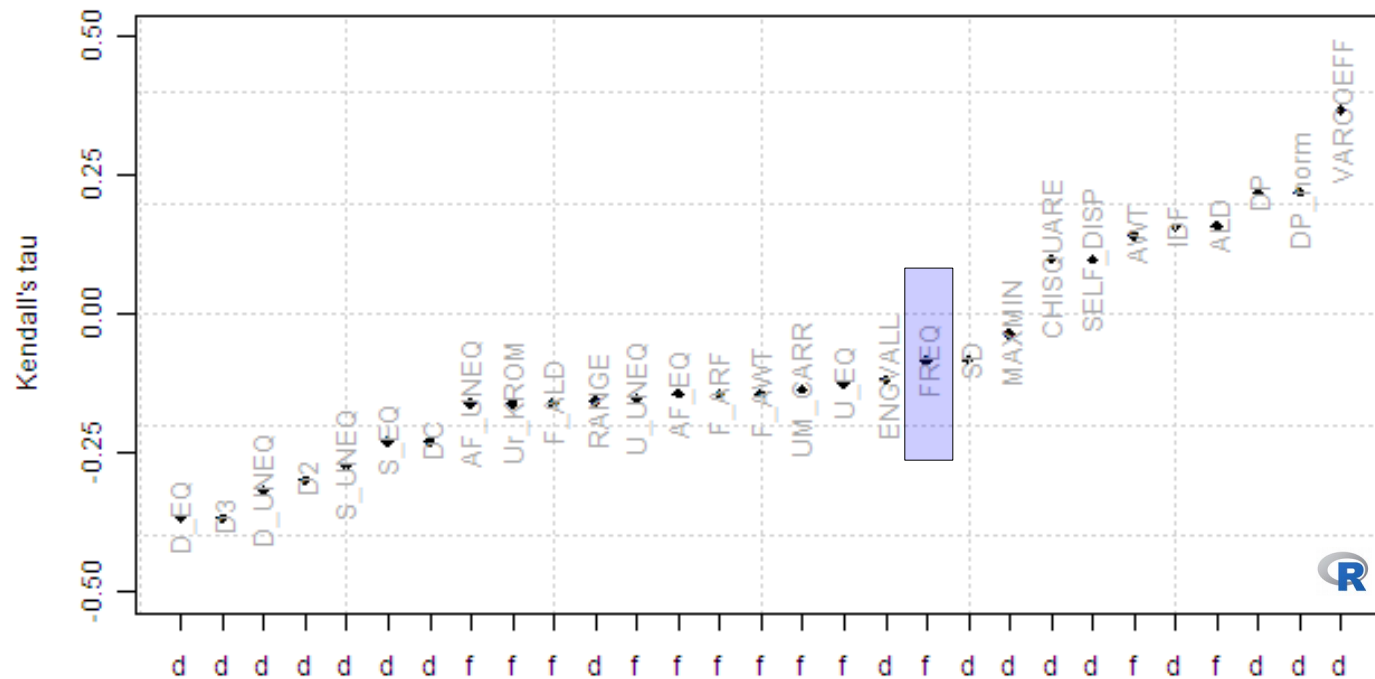

# What empirical motivation do we have to use dispersion?

- An extended example: Balota & Spieler's RT data for 2820 words measured for both older & younger subjects
  - I took 6 corpora
    - BNC Baby, BNC Sampler, BNC, BNC spoken, Brown, ICE-GB
  - computed  $DP_{norm}$  of each word type across files
  - correlated each word's RT w/ frequency &  $DP_{norm}$  to determine which predicts RTs best
- results
  - frequency is never the best predictor (despite its ubiquity, strong support for Baayen, Adelman et al.)

| Deviance expl.<br>by GAM | FREQ  |      | $DP_{norm}$ |      |
|--------------------------|-------|------|-------------|------|
|                          | young | old  | young       | old  |
| BNC Baby                 | 4.96  | 7.06 | 8.48        | 14.9 |
| BNC Sampler              | 5.22  | 6.44 | 9.07        | 13   |
| BNC                      | 5.06  | 7.57 | 9.26        | 17.3 |
| BNC spoken               | 4.26  | 5.88 | 8.64        | 14.3 |
| Brown                    | 4.78  | 6.77 | 7.85        | 13.2 |
| ICE-GB                   | 3.79  | 4.78 | 6.1         | 9.3  |



Note: I am not saying 'use dispersion  
*instead of* frequency' – use both!

- Let's look at a constructional slot: verbs in the English imperative
- step 1: frequency
  - ok-ish results
    - *see, let, look, take, go, get, tell, ...*

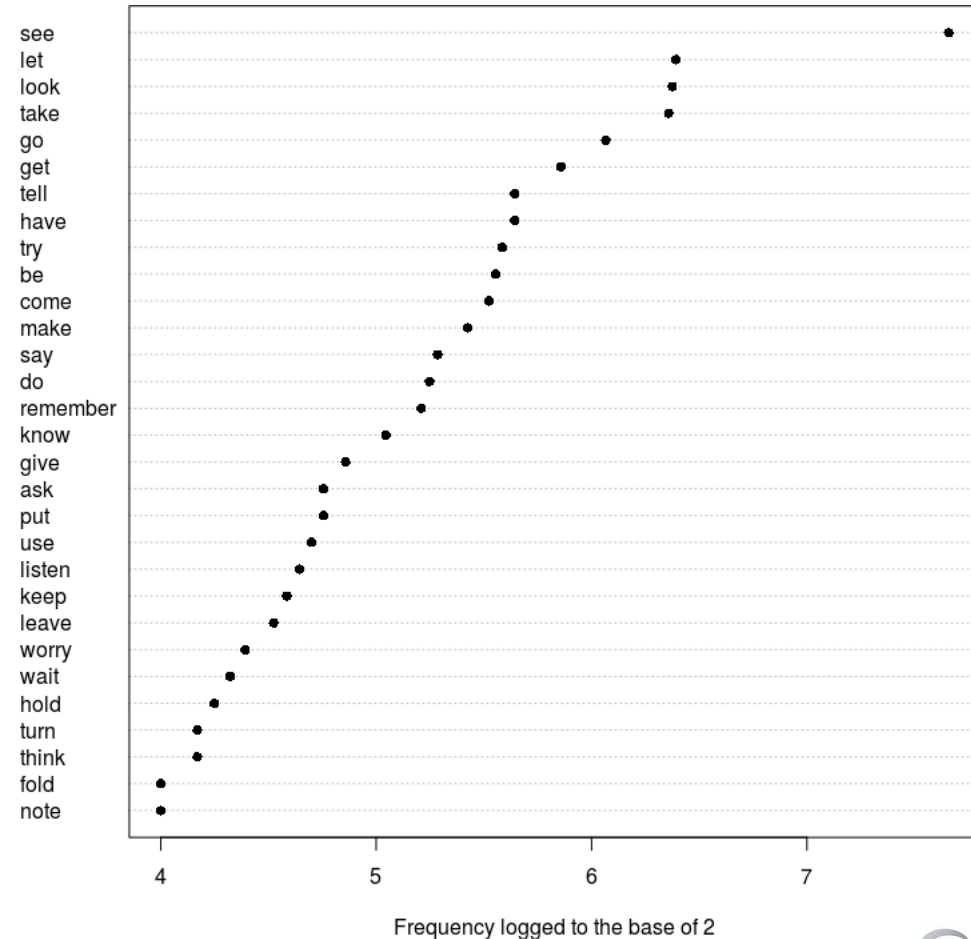

- ok-ish results
  - *see, let, look, take, go, get, tell, ...*

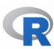



Note: I am not saying 'use dispersion *instead of* frequency' – use both!

- Step 3: frequency & mutual contingency & dispersion
  - *see* has high frequency & dispersion, but lower contingency than *let*, *worry*, *listen*, *shut* ...
  - *fold* and *process* get completely downgraded for lack of dispersion

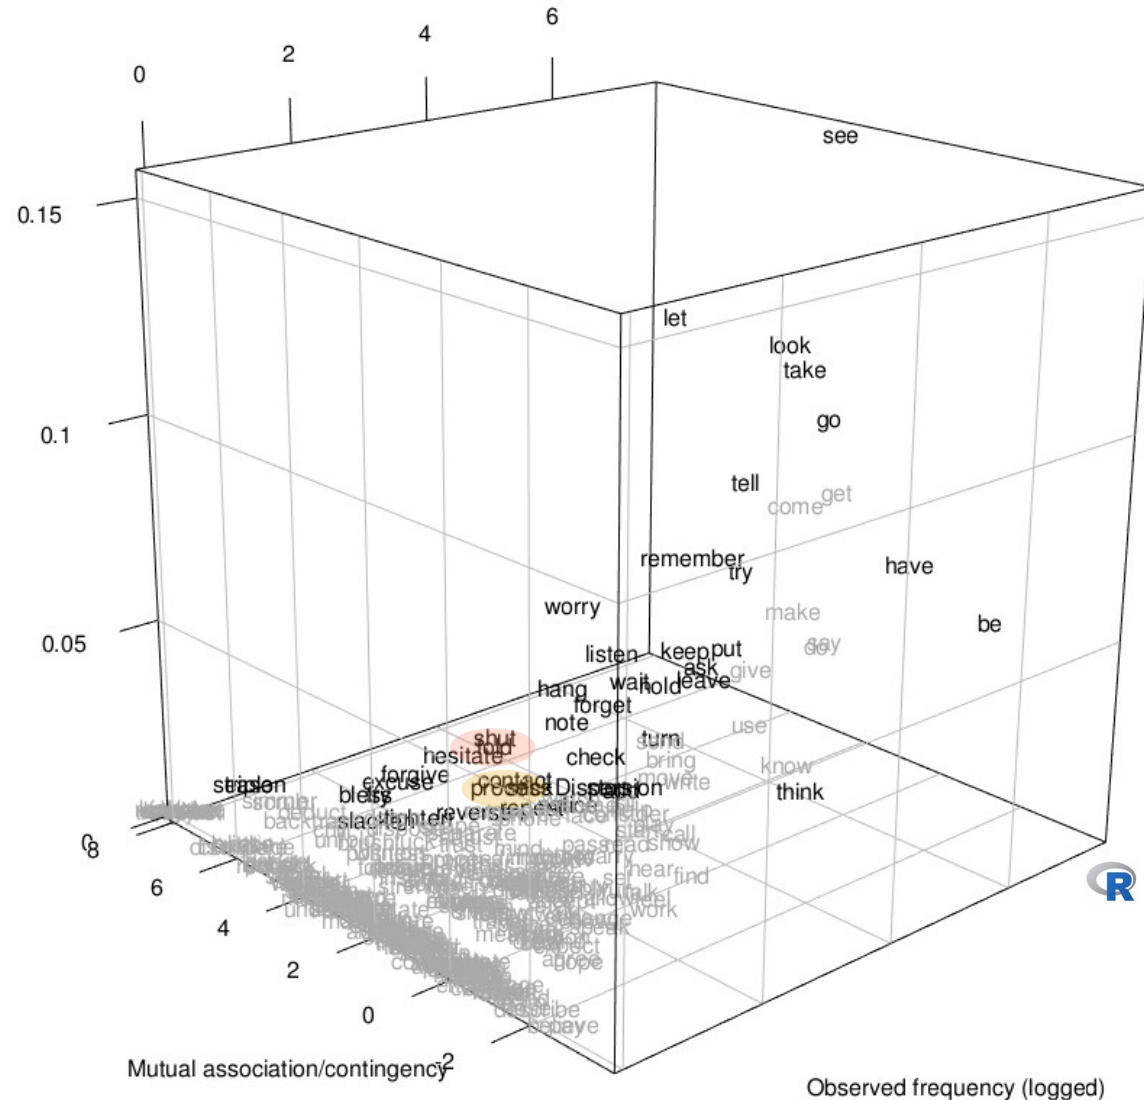

# Use both, but separately!

- Freq & disp are correlated ( $R^2=0.83$  BNCsp), but
- in the middle range of frequencies, words can have very similar frequencies but unequal dispersions
  - *staining* vs. *enormous* (in
  - *church* vs. *place* Brown)
  - in the 6th freq bin of BNCspkn
    - *council*: freq=4386,  $DP=0.72$ , range=292 out of 905
    - *nothing*: freq=4159,  $DP=0.28$ , range=652 out of 905
    - *try*: freq=4199,  $DP=0.28$ , range=664 out of 905
    - *whether*: freq=4490,  $DP=0.32$ , range=671 out of 905
    - the correlation between frequency & dispersion is low:  $R^2=0.08$

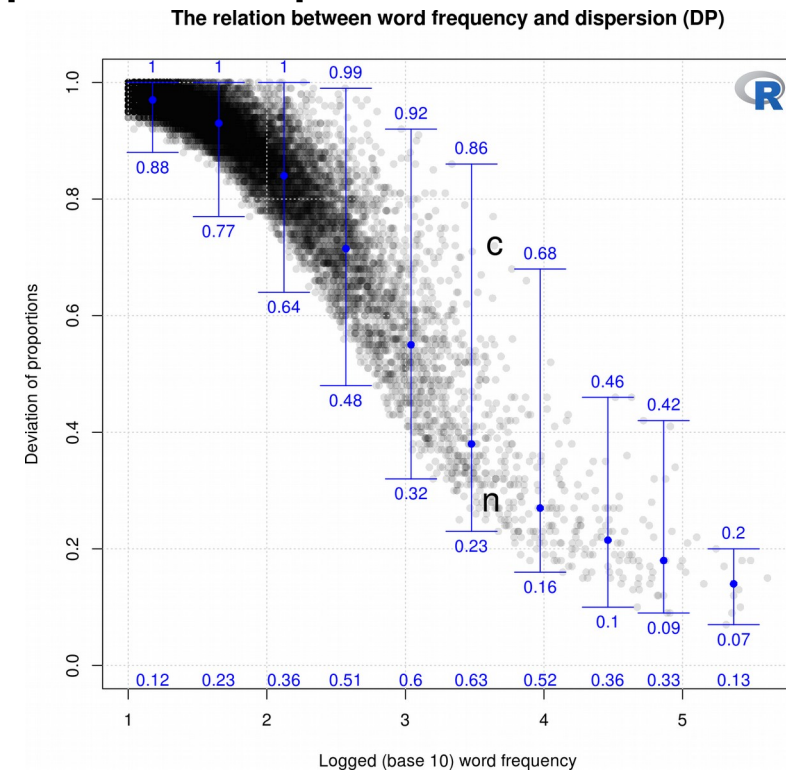

# Use both, but separately!

- Finally, the graphs also show that forcing frequency and dispersion into a single value – an **adjusted frequency** of the kind often used in lexicography – is a bad idea because of the information loss
  - theoretically, an adjusted freq. of 35 could result from
    - freq=350 & Juilland's  $D=0.1$
    - freq= 35 & Juilland's  $D=1$
  - yes, that's a hypothetical, but
    - adj.freq. for *pull* in BNCspkn  $\approx 375$
    - adj.freq. for *chairman*  $\approx 368$
    - pull*: freq= 750,  $DP=0.5$
    - chairman*: freq=1939,  $DP=0.81$
  - in the plot on the right, all the red dots represent words with  $365 \leq \text{adj. freq} \leq 434$ , but with  $701 \leq \text{freq} \leq 1939$

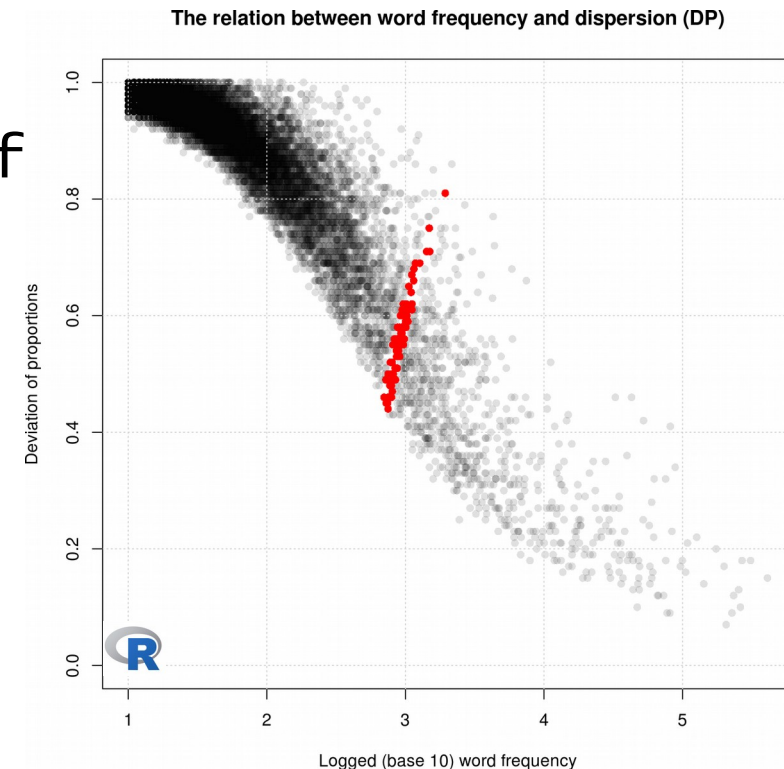

# Conclusions

- All the things that frequency was supposed to affect
  - learning & acquisition, memory, processing/cognition, ...
- are correlated w/ freq, but **recency overrides freq**
  - in the short term, as priming
  - in the longer term, as dispersion
- all corpus stats are at risk from such recency effects – the fact that occurrence or co-occurrence for any and all phenomena might not be evenly distributed across parts of a corpus: **aggregate freqs are mostly useless for anything cognitive**
- priming is highly predictive, cumulative, & moderated by distance, similarity
- dispersion explains more than freq-as-rep and should be computed over meaningful corpus parts
- but: **keep dimensions of information separate**
- with all that, freq effects we arrive at will be more accurate/reliable



Thank you!

<http://tinyurl.com/stgries>
